# Supplementary material for: Exosomes containing ErbB2/CRK induce vascular growth in premetastatic niches and promote metastasis of bladder cancer
Source: PubMed Central journal article supplement — Cancer Sci. 2019 Jun 24;110(7):2119–32. doi: 10.1111/cas.14080 (PMC6609816; doi:10.1111/cas.14080), 2019-06-24
Supplement: CAS-110-2119-s001.pdf [file CAS-110-2119-s001.pdf]

# Supporting Figure 1.

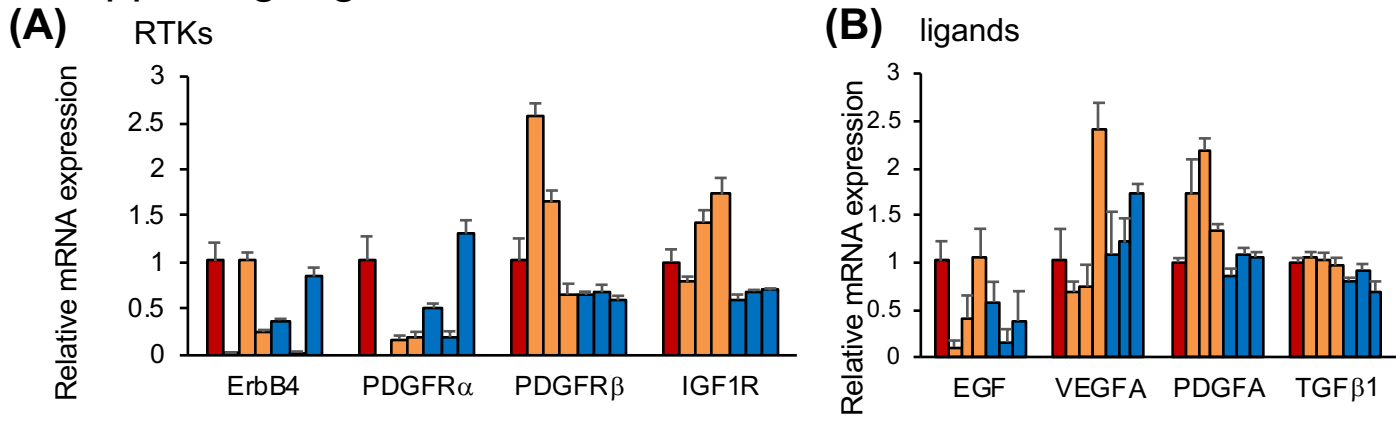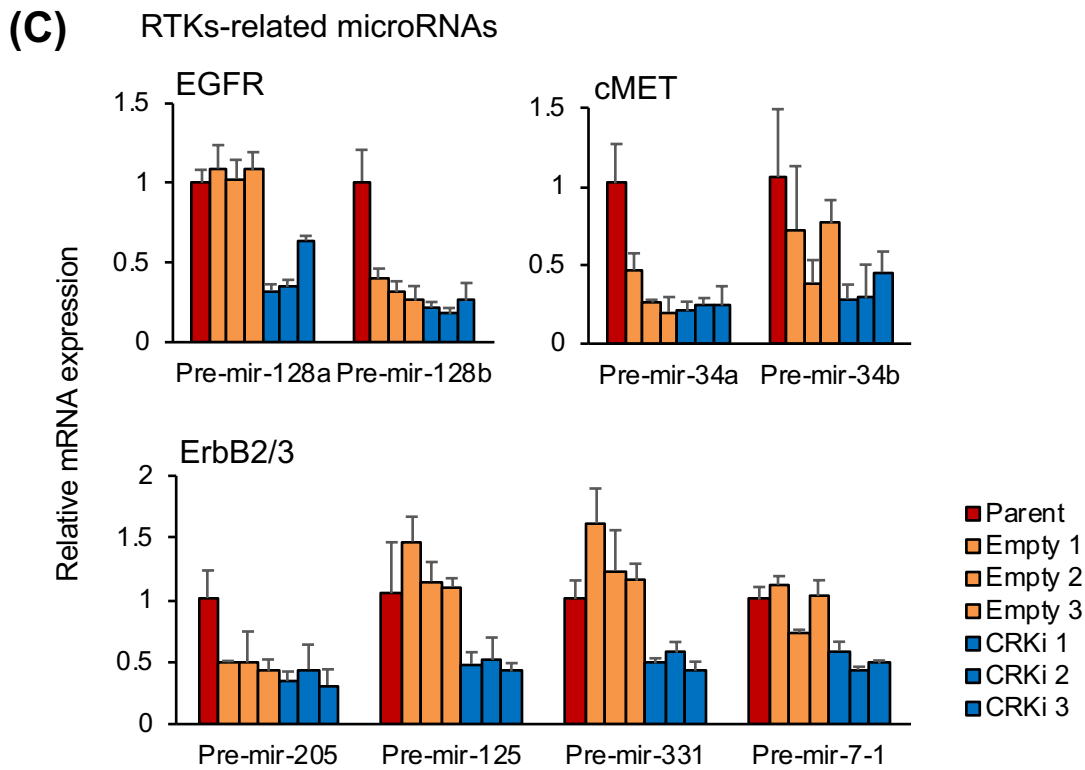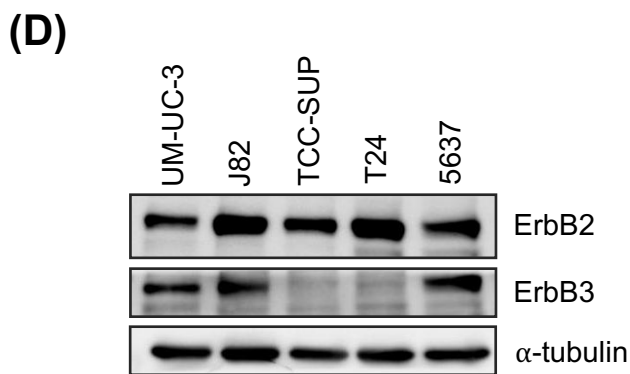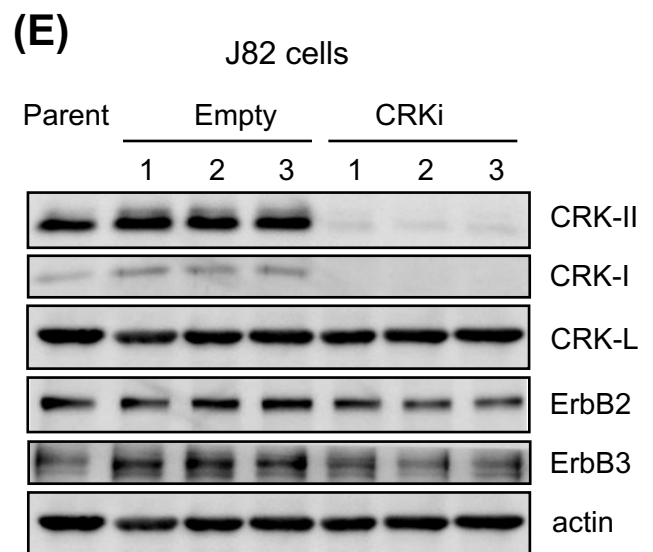

# Supporting Figure 1.

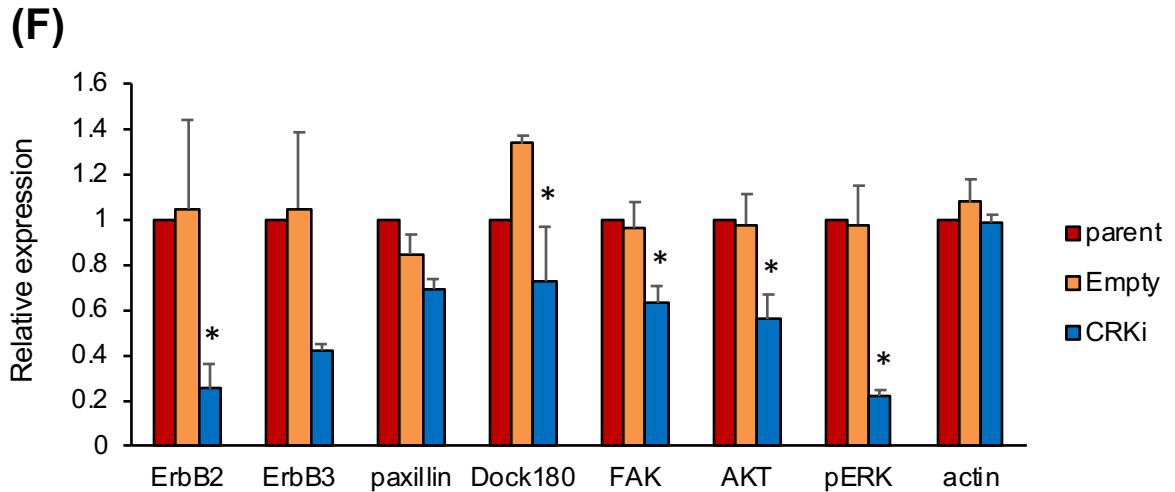

**Figure S1** Expression of receptors of tyrosine kinase (RTKs), their ligands, and RTK-related microRNAs in UM-UC-3 cells with or without CRK.

A,B, The mRNA expression levels of RTKs (A) and ligands (B) in UM-UC-3 cells with or without CRK were analyzed by qRT-PCR. C, The expression levels of microRNAs regulating the expression of EGFR, cMET, and ErbB2/3 were examined by qRT-PCR in UM-UC-3 cells with or without CRK. Data was shown as means and standard deviation (SD). D, In five bladder cancer cells, the expression levels of ErbB2 and ErbB3 proteins were investigated by immunoblotting (IB).  $\alpha$ -tubulin was used as a loading control. E, In J82 cells with or without CRK, the expression levels of CRK adaptors, ErbB2, and ErbB3 proteins were examined by IB. F, The intensities of bands shown in Figs. 2E and 2F were quantified, and presented as means and standard deviations (SD). \*,  $P < 0.05$ .
