# Supplementary material for: Exosomes containing ErbB2/CRK induce vascular growth in premetastatic niches and promote metastasis of bladder cancer
Source: PubMed Central journal article supplement — Cancer Sci. 2019 Jun 24;110(7):2119–32. doi: 10.1111/cas.14080 (PMC6609816; doi:10.1111/cas.14080), 2019-06-24
Supplement: CAS-110-2119-s002.pdf [file CAS-110-2119-s002.pdf]

# Supporting Figure 2.

(A)

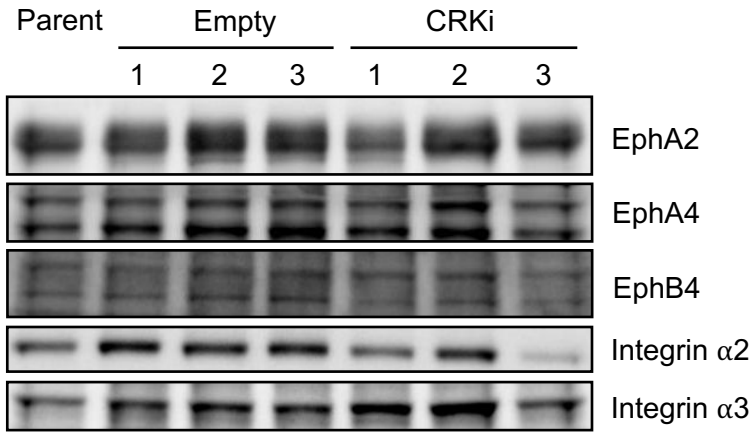

(B)

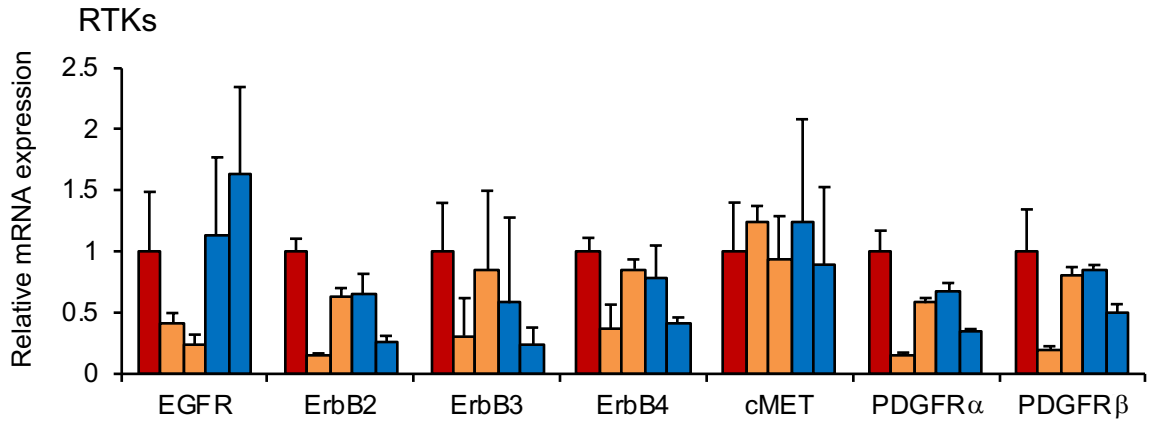

(C)

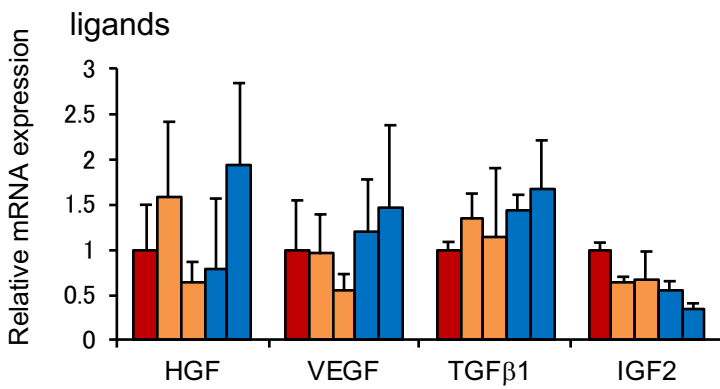

(D)

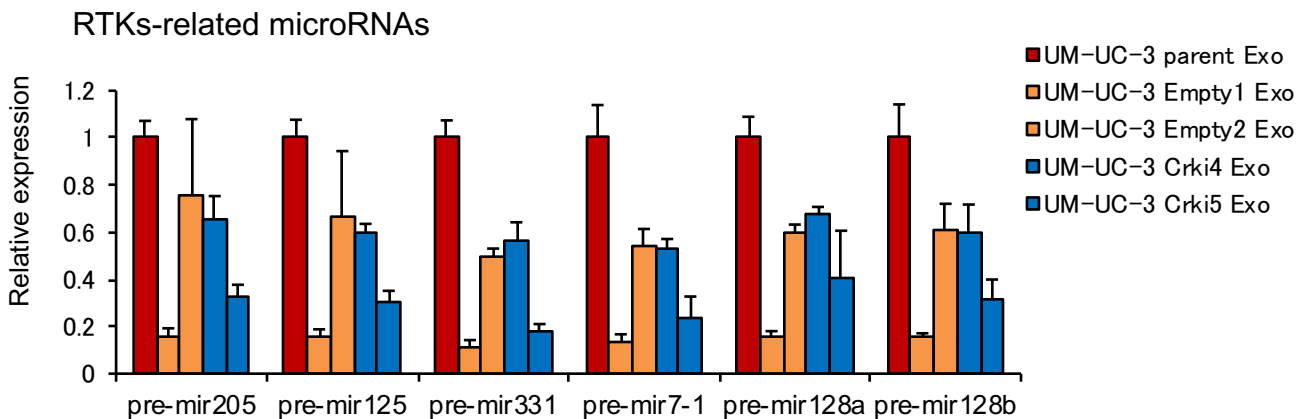

**Figure S2** Expression of RTKs, their ligands, and RTK-related microRNAs in exosomes derived from UM-UC-3 cells with or without CRK.

A, In UM-UC-3 cells in the presence or absence of CRK, expression levels of EphA2, EphA4, EphB4, integrin  $\alpha$ 2 and integrin  $\alpha$ 3 proteins were examined by IB, which were nominated as candidate molecules including in UM-UC-3-derived exosomes, by nano LC-MS/MS. B-D, In exosomes derived from UM-UC-3 cells with or without CRK, mRNA expression levels of RTKs (B) and ligands (C) and of microRNAs regulating the expression of ErbB2 and EGFR (D) were analyzed by qRT-PCR. mir126 is known to regulate crk genes. Data was shown as means and standard deviation (SD).
