# Supplementary material for: Exosomes containing ErbB2/CRK induce vascular growth in premetastatic niches and promote metastasis of bladder cancer
Source: PubMed Central journal article supplement — Cancer Sci. 2019 Jun 24;110(7):2119–32. doi: 10.1111/cas.14080 (PMC6609816; doi:10.1111/cas.14080), 2019-06-24
Supplement: CAS-110-2119-s003.pdf [file CAS-110-2119-s003.pdf]

# Supporting Figure 3.

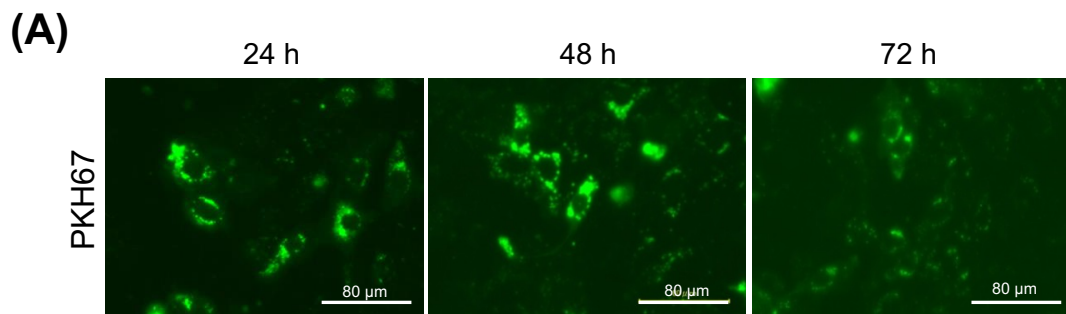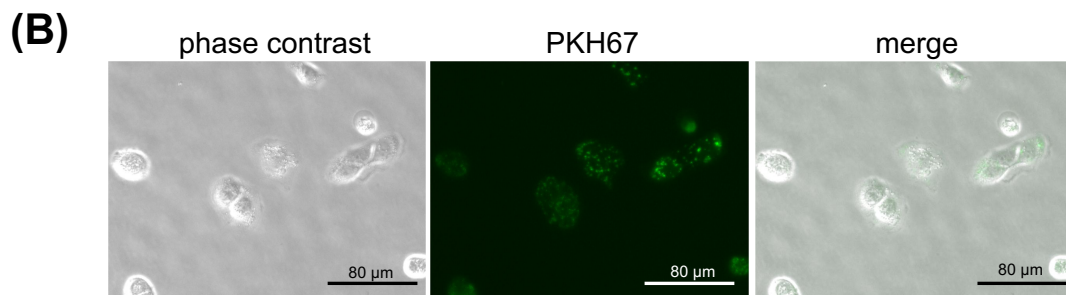

**(C)**                      5637 cells treated with exosome

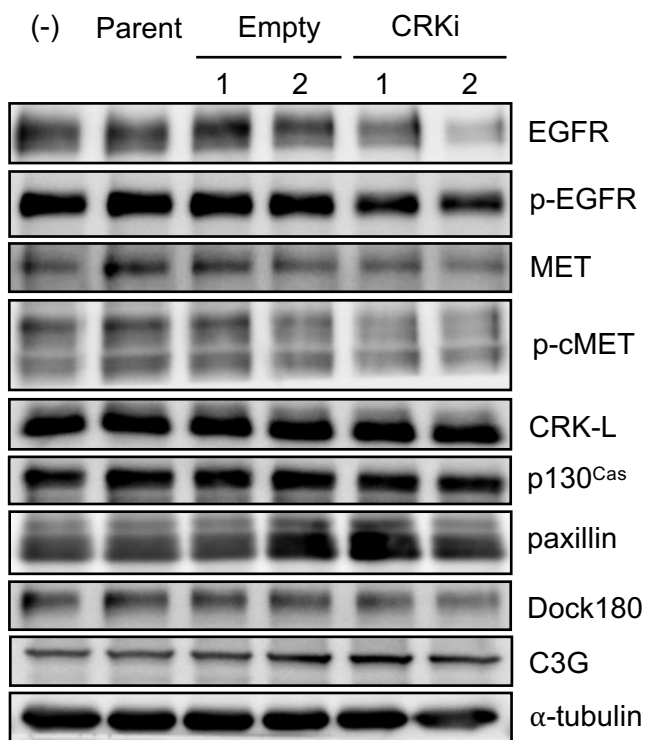

# Supporting Figure 3.

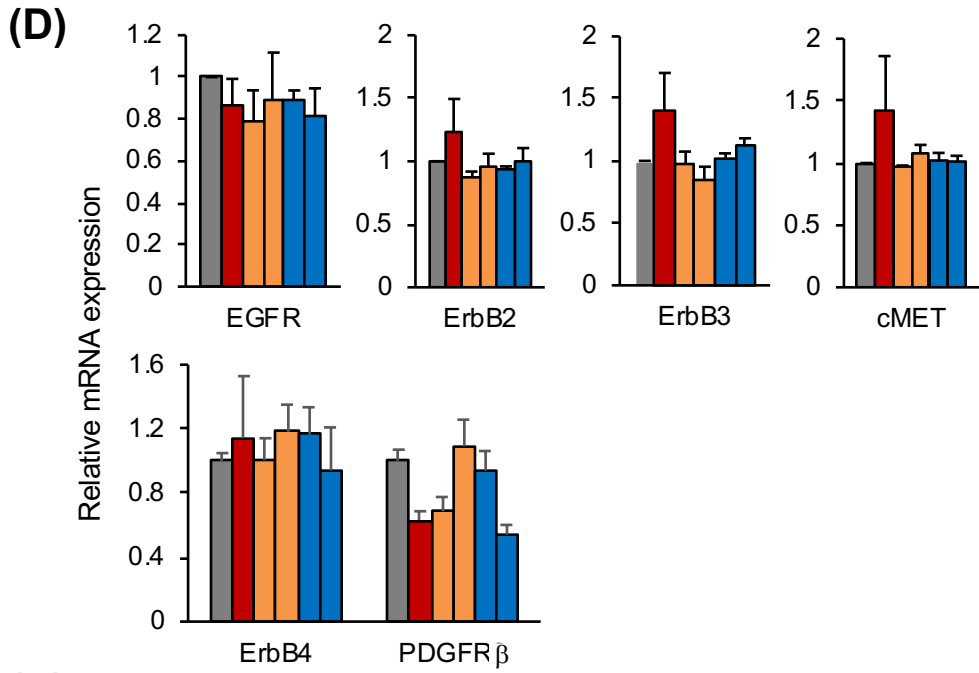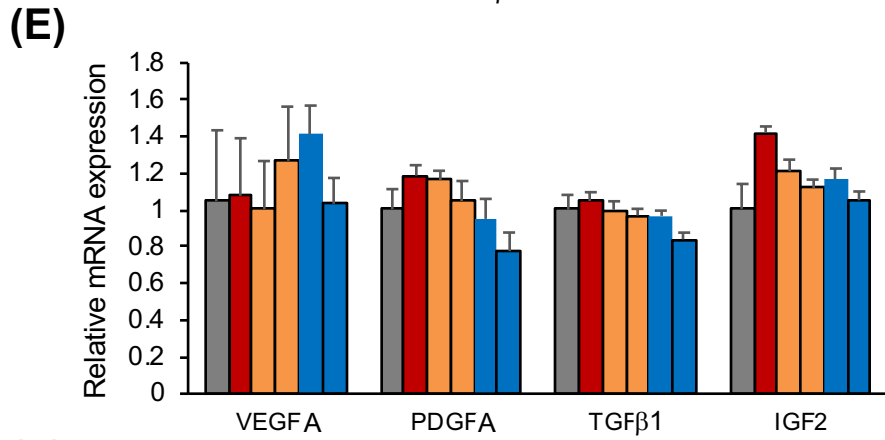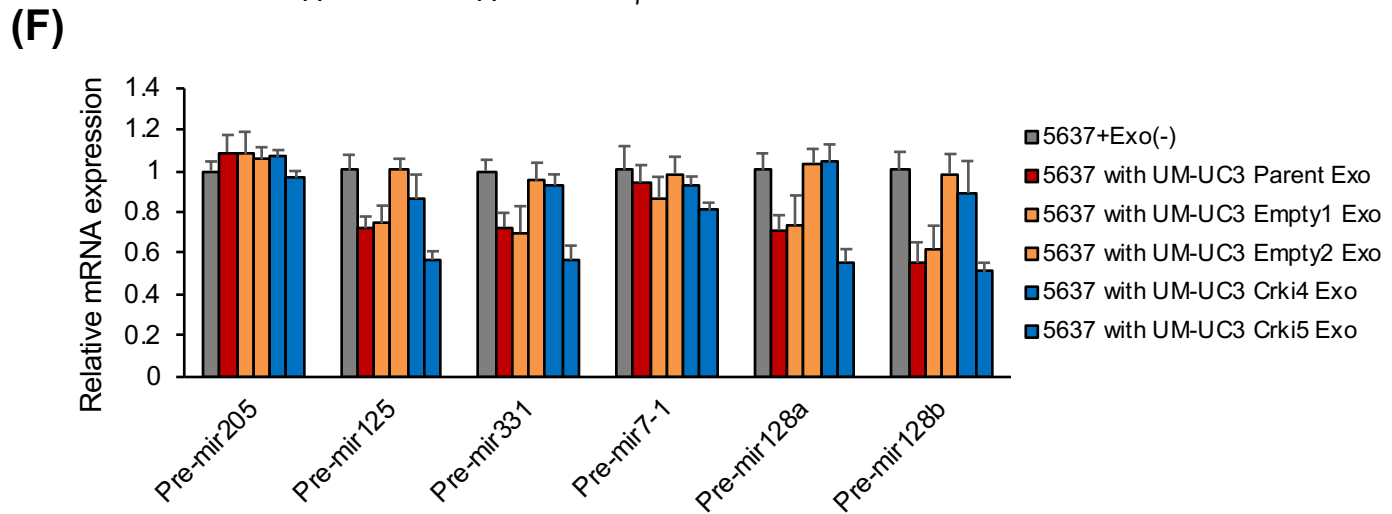

**Figure S3** Expression of RTKs, their ligands, microRNAs, and CRK-related molecules in 5637 cells treated with UM-UC-3-derived exosomes. A, PKH67-labeled exosomes (green) derived from UM-UC-3 were used to treat 5637 cells, and photomicrographs acquired after 24, 48, 72 h are shown. B, As a control, 5637 cells were directly treated with PKH67 dye for 48 h. C, In the cells treated with UM-UC-3-derived exosomes (parent, empty, and CRKi), the expression and phosphorylation of RTKs and CRK-related proteins were examined by IB. D-F, In the cells treated with UM-UC-3-derived exosomes (parent, empty, and CRKi), mRNA expression levels of RTKs (D), the ligands (E), and the microRNAs regulating the expression of ErbB2 and EGFR (F) were analyzed by qRT-PCR. Data was shown as means and standard deviation (SD).
