# Supplementary material for: Exosomes containing ErbB2/CRK induce vascular growth in premetastatic niches and promote metastasis of bladder cancer
Source: PubMed Central journal article supplement — Cancer Sci. 2019 Jun 24;110(7):2119–32. doi: 10.1111/cas.14080 (PMC6609816; doi:10.1111/cas.14080), 2019-06-24
Supplement: CAS-110-2119-s004.pdf [file CAS-110-2119-s004.pdf]

## Supporting Figure 4.

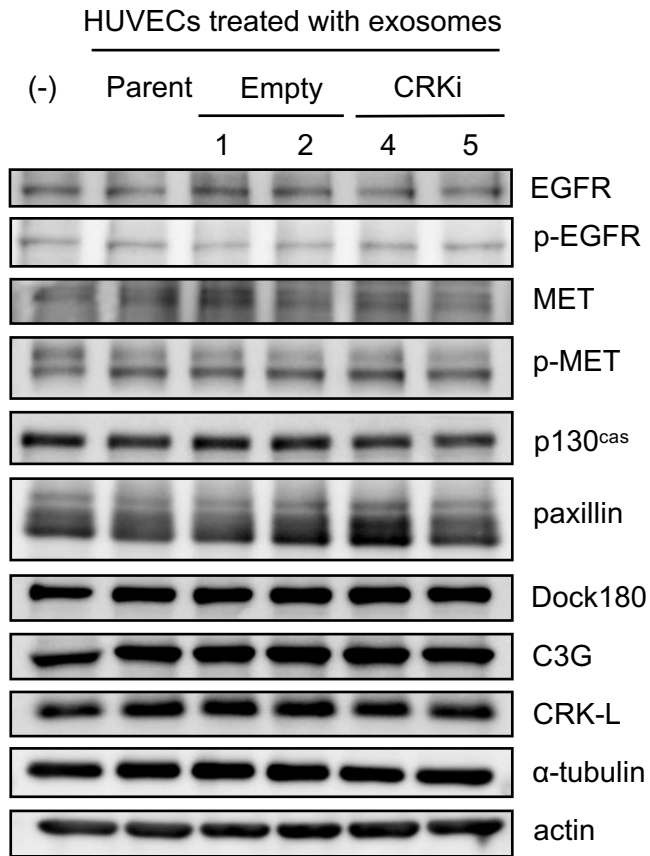

### Figure S4

In HUVECs treated with UM-UC-3-derived exosomes (parent, empty, and CRKi), levels of expression and phosphorylation of RTKs and CRK-related proteins were examined by IB. HUVECs were maintained in EBM-2 EGM-2 Bullet Kit (Lonza, Walkersville, MD).
